# Supplementary material for: Is there a hydrogen bond radius? Evidence from microwave spectroscopy, neutron scattering and X-ray diffraction results
Source: Royal Society of Chemistry journal article supplement (doi:10.1039/b411815d), 2005-01-01
Supplement: b411815d.pdf [file b411815d.pdf]

TABLE SI: X-RAY AND NEUTRON DIFFRACTION DATA

| H—D                                                                                            | $\text{C}\equiv\text{N}$<br>$\text{C}\equiv\text{N}\cdots\text{H}-\text{D}$<br>$(R_E(A) = 1.37)$ |                           | Pyridine<br>$\text{PyN}\cdots\text{H}-\text{D}$<br>$(R_E(A) = 1.30)$ |                           | $\text{C}-\text{O}$<br>$\text{C}-\text{O}\cdots\text{H}-\text{D}$<br>$(R_E(A) = 1.30)$ |                           | $\text{C}=\text{O}$<br>$\text{C}=\text{O}\cdots\text{H}-\text{D}$<br>$(R_E(A) = 1.32)$ |                           |
|------------------------------------------------------------------------------------------------|--------------------------------------------------------------------------------------------------|---------------------------|----------------------------------------------------------------------|---------------------------|----------------------------------------------------------------------------------------|---------------------------|----------------------------------------------------------------------------------------|---------------------------|
|                                                                                                | $R_{\text{H}\cdots\text{N}}$                                                                     | $R_{\text{H}}(\text{HD})$ | $R_{\text{H}\cdots\text{N}}$                                         | $R_{\text{H}}(\text{HD})$ | $R_{\text{H}\cdots\text{O}}$                                                           | $R_{\text{H}}(\text{HD})$ | $R_{\text{H}\cdots\text{O}}$                                                           | $R_{\text{H}}(\text{HD})$ |
| O—H                                                                                            | $1.98 \pm 0.15$                                                                                  | $0.61 \pm 0.15$           | $1.86 \pm 0.15$                                                      | $0.56 \pm 0.15$           | $1.98 \pm 0.15$                                                                        | $0.68 \pm 0.15$           | $1.85 \pm 0.15$                                                                        | $0.53 \pm 0.15$           |
| H—N                                                                                            | $2.20 \pm 0.15$                                                                                  | $0.83 \pm 0.15$           | $2.10 \pm 0.15$                                                      | $0.80 \pm 0.15$           | $2.05 \pm 0.13$                                                                        | $0.75 \pm 0.13$           | $1.98 \pm 0.15$                                                                        | $0.66 \pm 0.15$           |
| H—C                                                                                            | 2.79                                                                                             | 1.42                      | —                                                                    | —                         | 2.32                                                                                   | 1.02                      | —                                                                                      | —                         |
| $\begin{array}{c} \text{H}-\text{C} \\ \parallel \\ \text{O} \end{array}$                      | —                                                                                                | —                         | —                                                                    | —                         | 2.52                                                                                   | 1.22                      | $2.44 \pm 0.18$                                                                        | $1.12 \pm 0.18$           |
| H—C≡C                                                                                          | —                                                                                                | —                         | —                                                                    | —                         | —                                                                                      | —                         | $2.36 \pm 0.10$                                                                        | $1.04 \pm 0.10$           |
| $\begin{array}{c} \text{Cl} \\   \\ \text{H}-\text{C}-\text{Cl} \\   \\ \text{Cl} \end{array}$ | —                                                                                                | —                         | 2.37                                                                 | 1.07                      | 2.32                                                                                   | 1.02                      | $2.16 \pm 0.16$                                                                        | $0.84 \pm 0.16$           |

TABLE S2: ENTRIES IN X-RAY AND NEUTRON DIFFRACTION DATA

| H—D                                                                         | C≡N—H—D |      | PyN—H—D |     | $\begin{array}{c} \text{C—O—H—D} \\   \\ \text{C} \end{array}$ |      | C=O—H—D |      |
|-----------------------------------------------------------------------------|---------|------|---------|-----|----------------------------------------------------------------|------|---------|------|
|                                                                             | T       | E    | T       | E   | T                                                              | E    | T       | E    |
| H—O                                                                         | 1830    | 315  | 2729    | 778 | 8430                                                           | 2026 | 10000   | 4359 |
| H—N                                                                         | 3602    | 1054 | 1187    | 439 | 4629                                                           | 655  | 10000   | 4129 |
| H—C                                                                         | 10000   | 0    | 10000   | 0   | 10000                                                          | 39   | 10000   | 0    |
| H—S                                                                         | 0       | 0    | 0       | 0   | 6                                                              | 0    | 19      | 0    |
| H—C≡C                                                                       | 8       | 0    | 12      | 0   | 76                                                             | 0    | 119     | 47   |
| $\begin{array}{c} \text{F} \\   \\ \text{H—C} \\   \\ \text{F} \end{array}$ | 3       | 0    | 1       | 0   | 2                                                              | 0    | 15      | 0    |

| $\text{H}-\text{D}$                                                                                                                                | $\text{C}\equiv\text{N}\cdots\text{H}-\text{D}$ |   | $\text{PyN}\cdots\text{H}-\text{D}$ |    | $\text{C}-\text{O}\cdots\text{H}-\text{D}$<br>$\quad\quad\quad\text{C}$ |    | $\text{C}=\text{O}\cdots\text{H}-\text{D}$ |     |
|----------------------------------------------------------------------------------------------------------------------------------------------------|-------------------------------------------------|---|-------------------------------------|----|-------------------------------------------------------------------------|----|--------------------------------------------|-----|
|                                                                                                                                                    | T                                               | E | T                                   | E  | T                                                                       | E  | T                                          | E   |
| $\begin{array}{c} \text{H} \\   \\ \text{H}-\text{C}-\text{C} \\   \\ \text{H} \end{array}$                                                        | 10000                                           | 0 | 4523                                | 0  | 10000                                                                   | 0  | 10000                                      | 0   |
| $\begin{array}{c} \text{H} \quad \text{H} \\   \quad   \\ \text{H}-\text{C}-\text{C}-\text{H} \\   \quad   \\ \text{H} \quad \text{H} \end{array}$ | 2857                                            | 0 | 629                                 | 31 | 4497                                                                    | 0  | 10000                                      | 0   |
| $\begin{array}{c} \text{H}-\text{C} \\ \quad \quad    \\ \quad \quad \text{O} \end{array}$                                                         | 99                                              | 0 | 19                                  | 0  | 159                                                                     | 18 | 1198                                       | 102 |
| $\begin{array}{c} \text{Cl} \\   \\ \text{H}-\text{C}-\text{Cl} \\   \\ \text{Cl} \end{array}$                                                     | 41                                              | 0 | 48                                  | 17 | 73                                                                      | 21 | 207                                        | 70  |

NOTE:

T – Total number of entries. E – Number of entries below the peak.

**Table S3:** Topographical and geometric parameters for substituted pyridines (Py) at HF/6-31+g(d) level of theory.

| Substrate                                          | d(N..X)<br>(Å) | MESP at X<br>(kcal.mol <sup>-1</sup> ) |
|----------------------------------------------------|----------------|----------------------------------------|
| Py                                                 | 1.27           | -67.82                                 |
| Py-CHO(p)                                          | 1.27           | -59.14                                 |
| Py-CHO(m)                                          | 1.26           | -58.17                                 |
| Py-NH <sub>2</sub> (m)                             | 1.26           | -68.97                                 |
| Py-OMe(m)-OMe(m)-NMe <sub>2</sub> (p)              | 1.26           | -67.73                                 |
| Py-OMe(m)-OMe(m)                                   | 1.26           | -66.27                                 |
| Py-CH <sub>3</sub> (p)                             | 1.25           | -70.18                                 |
| Py-CH <sub>3</sub> (m)                             | 1.25           | -69.09                                 |
| Py-NH <sub>2</sub> (p)                             | 1.25           | -76.29                                 |
| Py-OMe(m)-OMe(m)-NH <sub>2</sub> (p)               | 1.25           | -72.79                                 |
| Py-NO <sub>2</sub> (m)-NO <sub>2</sub> (m)-COOH(p) | 1.30           | -34.26                                 |
| Py-NO <sub>2</sub> (m)-NO <sub>2</sub> (m)-CN(p)   | 1.31           | -27.65                                 |

**Table S4.** Topographical parameters for substituted carbonyl molecules at HF/6-31+g(d) level of theory.

Distances in Å and MESP values in kcal.mol<sup>-1</sup> See Figure below for notation and details.

| Carbonyl compound                                 | d(O..X1)<br>(Å) | d(O..X2)<br>(Å) | ∠COX1 | ∠COX2 | MESP at X1 | MESP at X2 |
|---------------------------------------------------|-----------------|-----------------|-------|-------|------------|------------|
| H-CO-Cl                                           | 1.30            | 1.30            | 136   | 131   | -31.75     | -35.33     |
| CH <sub>3</sub> -CO-Cl                            | 1.28            | 1.28            | 139   | 129   | -35.96     | -41.67     |
| CH <sub>3</sub> -CO-F                             | 1.26            | 1.26            | 137   | 127   | -42.36     | -47.00     |
| H-CO-H                                            | 1.26            | 1.26            | 129   | 129   | -49.01     | -49.01     |
| CH <sub>3</sub> -CO-H                             | 1.25            | 1.24            | 130   | 128   | -53.72     | -54.72     |
| CH <sub>3</sub> -CO-OMe                           | 1.21            | 1.22            | 129   | 136   | -57.04     | -53.21     |
| CH <sub>3</sub> -CO-CH <sub>3</sub>               | 1.20            | 1.20            | 129   | 129   | -58.58     | -58.70     |
| C <sub>2</sub> H <sub>5</sub> -CO-CH <sub>3</sub> | 1.20            | 1.20            | 129   | 128   | -58.67     | -59.05     |
| H-CO-NH <sub>2</sub>                              | 1.20            | 1.20            | 128   | 134   | -65.45     | -61.94     |
| H-CO-NO <sub>2</sub>                              | 1.36            | 1.41            | 142   | 121   | -17.98     | -25.29     |

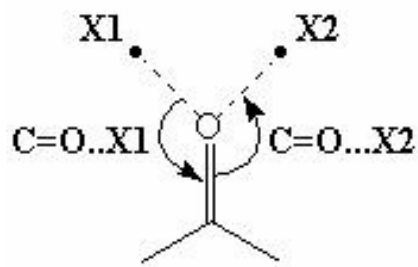

# Supplementary Material (ESI) for New Journal of Chemistry  
 # This journal is © The Royal Society of Chemistry and  
 # The Centre National de la Recherche Scientifique, 2004

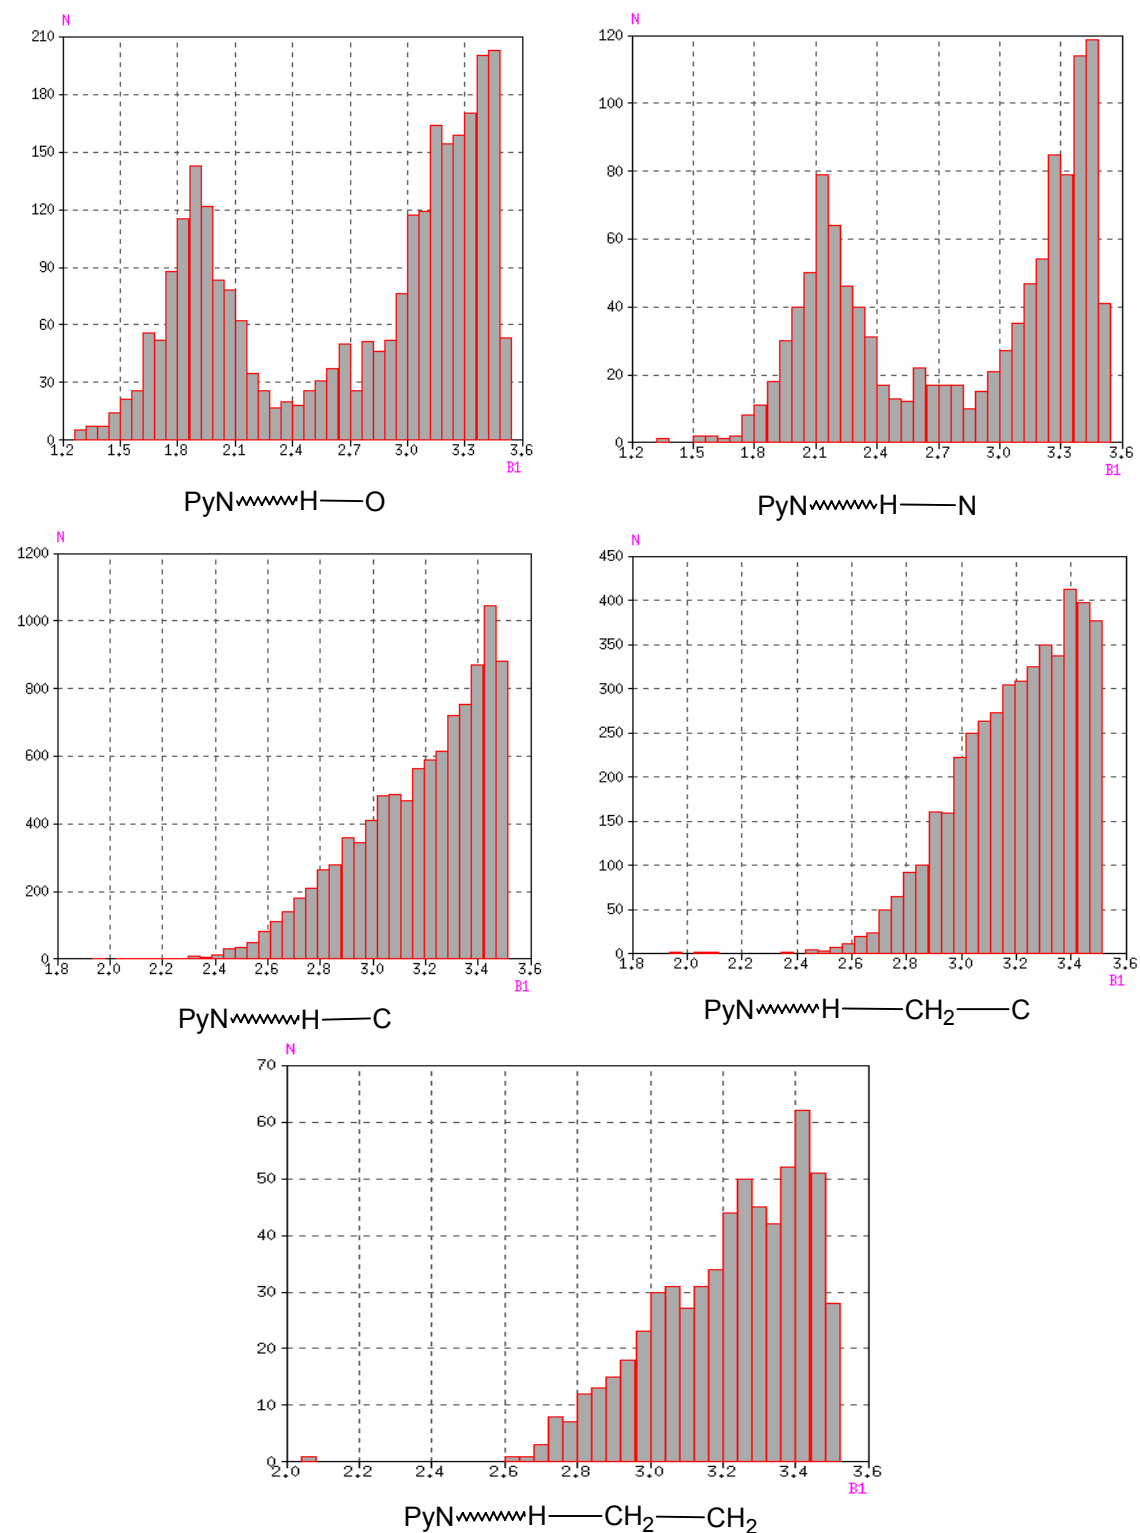

Lakshmi et al. Figure S1

# Supplementary Material (ESI) for New Journal of Chemistry  
# This journal is © The Royal Society of Chemistry and  
# The Centre National de la Recherche Scientifique, 2004

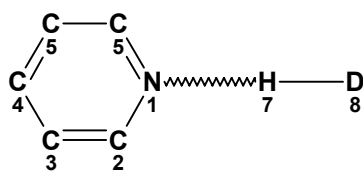

# Supplementary Material (ESI) for New Journal of Chemistry  
# This journal is © The Royal Society of Chemistry and  
# The Centre National de la Recherche Scientifique, 2004

Printout of the JNL file used for searching C=O----H-N contacts from CSD.

```
T1 *CONN
NFRAG 1
AT1 C 1 :XY 203 487
AT2 O 1 :XY 410 496
AT3 H 1 :XY 590 505
AT4 N 1 :XY 797 511
BO 1 2 2
BO 3 4 1
GEOM
DEFINE B1 2 3
DEFINE B2 3 4
DEFINE A1 1 2 3
DEFINE A2 2 3 4
DEFINE T1 1 2 3 4
CONTACT INTER 2 A 3 A 0.5 3.5
C Search for ALL unique crystal fragments
NFRAG -99
C Overlap of crystal fragments permitted
C Rejection of symmetry-equivalent crystal fragments is ON
SYMCHK ON
ENANT NOIN
END
T2 *RFACTOR .LE. 4.0000
COMMENT Turning ON "INSIST-ON-COORDS"
SCREEN 153
COMMENT Turning ON "INSIST-NO-DISORDER"
SCREEN 35
COMMENT Turning ON "INSIST-ERROR-FREE"
SCREEN 33
```



# Supplementary Material (ESI) for New Journal of Chemistry  
# This journal is © The Royal Society of Chemistry and  
# The Centre National de la Recherche Scientifique, 2004

QUEST T1.AND.T2
